# Supplementary material for: Cardiac postacute sequelae symptoms of SARS-CoV-2 in community-dwelling adults: cross-sectional study
Source: HighWire-hosted journal article supplement (doi:10.1136/openhrt-2022-002084), 2022-09-01
Supplement: openhrt-2022-002084supp002_data_supplement.pdf [file openhrt-2022-002084supp002_data_supplement.pdf]

**Cardiac-related Post-acute Sequelae symptoms of SARS-CoV-2 infection in Community-Dwelling Adults: A Cross-sectional Study****\*Corresponding Author**

Oluwabunmi Ogungbe, MPH, RN<sup>1</sup>  
Johns Hopkins School of Nursing  
525 N. Wolfe St.  
Baltimore, MD. 21205  
Email: [oogungb3@jh.edu](mailto:oogungb3@jh.edu)

## Supplemental Materials

Supplemental Table 1. Newly diagnosed conditions after acute COVID-19 infection stratified by time since infection

| <b><u>Newly diagnosed Conditions.</u></b>               |                           |                                    |                                 |                       |
|---------------------------------------------------------|---------------------------|------------------------------------|---------------------------------|-----------------------|
| <b><u>n(%)</u></b>                                      | <b><u>Total N=119</u></b> | <b><u>Time since infection</u></b> |                                 | <b><u>P-value</u></b> |
|                                                         |                           | <b><u>&lt;18 Months (N=81)</u></b> | <b><u>≥18 Months (N=38)</u></b> |                       |
| <u>Hypertension</u>                                     | <u>24 (20.2)</u>          | <u>18 (22.2)</u>                   | <u>6 (15.8)</u>                 | <u>0.415</u>          |
| <u>Tachycardia</u>                                      | <u>29 (24.4)</u>          | <u>14 (17.3)</u>                   | <u>15 (39.5)</u>                | <b><u>0.009</u></b>   |
| <u>Myocarditis</u>                                      | <u>5 (4.2)</u>            | <u>1 (1.2)</u>                     | <u>4 (10.5)</u>                 | <b><u>0.019</u></b>   |
| <u>Cardiomyopathy</u>                                   | <u>--</u>                 | <u>--</u>                          | <u>--</u>                       | <u>--</u>             |
| <u>Myocardial injury</u>                                | <u>1 (0.8)</u>            | <u>--</u>                          | <u>1 (2.6)</u>                  | <u>0.143</u>          |
| <u>Atrial fibrillation or flutter</u>                   | <u>8 (6.7)</u>            | <u>4 (4.9)</u>                     | <u>4 (10.5)</u>                 | <u>0.256</u>          |
| <u>Pericarditis</u>                                     | <u>1 (0.8)</u>            | <u>1 (1.2)</u>                     | <u>--</u>                       | <u>0.492</u>          |
| <u>Myocardial infarction</u>                            | <u>1 (0.8)</u>            | <u>1 (1.2)</u>                     | <u>--</u>                       | <u>0.492</u>          |
| <u>Heart block</u>                                      | <u>3 (2.5)</u>            | <u>2 (2.5)</u>                     | <u>1 (2.6)</u>                  | <u>0.958</u>          |
| <u>Heart failure</u>                                    | <u>3 (2.5)</u>            | <u>2 (2.5)</u>                     | <u>1 (2.6)</u>                  | <u>0.958</u>          |
| <u>Pulmonary embolism</u>                               | <u>1 (0.8)</u>            | <u>--</u>                          | <u>1 (2.6)</u>                  | <u>0.143</u>          |
| <u>Deep Vein Thrombosis</u>                             | <u>2 (1.7)</u>            | <u>1 (2.6)</u>                     | <u>1 (2.6)</u>                  | <u>0.580</u>          |
| <u>Stroke</u>                                           | <u>1 (0.8)</u>            | <u>1 (1.2)</u>                     | <u>--</u>                       | <u>0.492</u>          |
| <u>Acute kidney disease</u>                             | <u>2 (1.7)</u>            | <u>--</u>                          | <u>2 (5.3)</u>                  | <u>0.037</u>          |
| <u>Postural orthostatic tachycardia syndrome (POTS)</u> | <u>16 (13.5)</u>          | <u>8 (9.9)</u>                     | <u>8 (21.1)</u>                 | <u>0.096</u>          |

Bold: Statistically significant at <0.05. P-values estimated using chi-square test statistics for differences in proportions.
