# Supplementary figures and images for: Cardiac postacute sequelae symptoms of SARS-CoV-2 in community-dwelling adults: cross-sectional study
Source: HighWire-hosted journal article supplement (doi:10.1136/openhrt-2022-002084), 2022-09-01

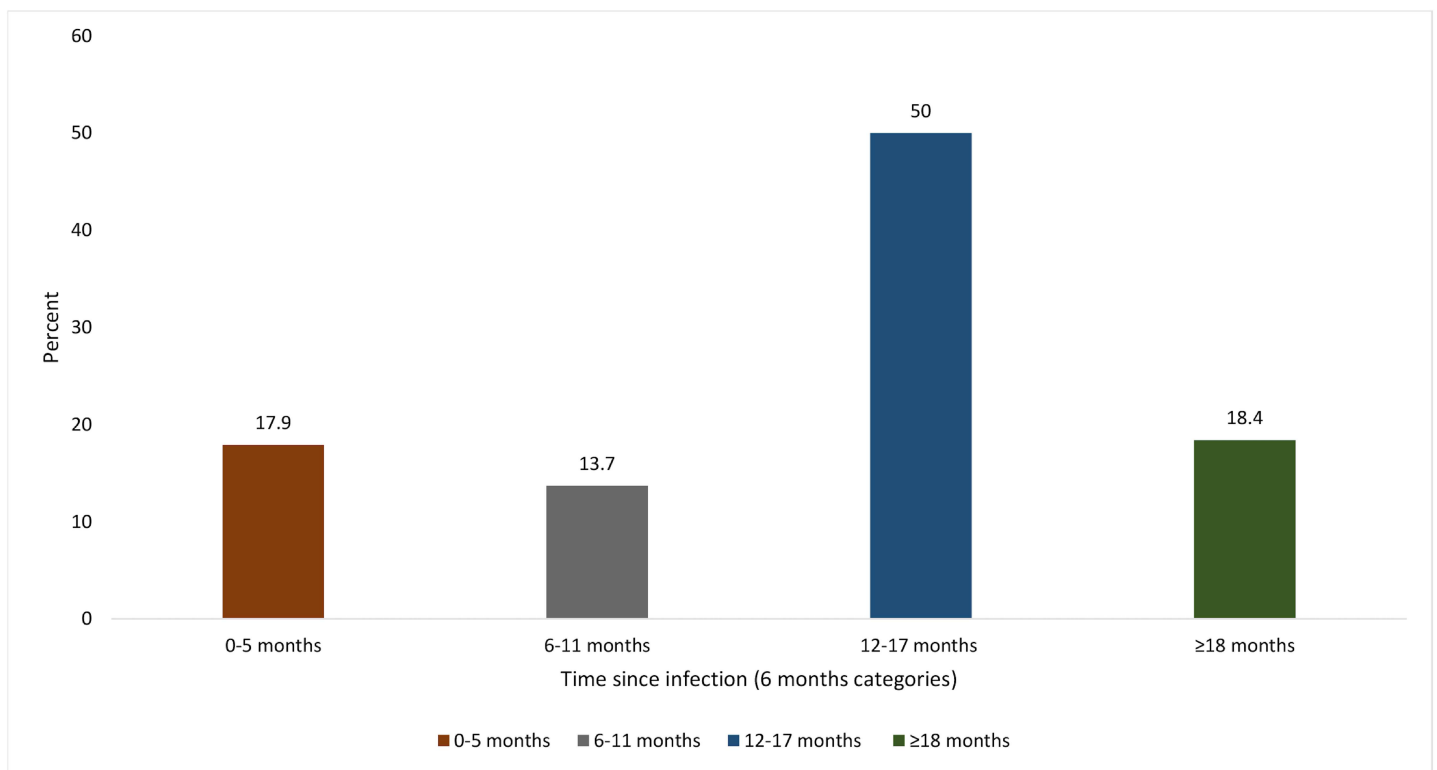

Supplement: openhrt-2022-002084supp001_data_supplement.pdf [file openhrt-2022-002084supp001_data_supplement.pdf]
